# Supplementary material for: An in vitro toolbox to accelerate anti-malarial drug discovery and development
Source: Springer Nature journal article supplement (doi:10.1186/s12936-019-3075-5), 2020-01-02
Supplement: MOESM1 [file 17641776]

***An in vitro* toolbox to accelerate antimalarial  
drug discovery and development**

Susan A. Charman<sup>\*</sup>, Alice Andreu, Helena Barker, Scott Blundell, Anna Campbell, Michael Campbell, Gong Chen, Francis C.K. Chiu, Elly Crighton, Kasiram Katneni, Julia Morizzi, Rahul Patil, Thao Pham, Eileen Ryan, Jessica Saunders, David M. Shackleford, Karen L. White, Lisa Almond, Maurice Dickins, Dennis A. Smith, Joerg J. Moehrle, Jeremy N. Burrows, Nada Abla

**ADDITIONAL INFORMATION**

**Table S1 Structures and salt forms**

| Compound     | Salt            | Biological Target                               | Structure                                                                            | Status   |
|--------------|-----------------|-------------------------------------------------|--------------------------------------------------------------------------------------|----------|
| Amodiaquine  | Dihydrochloride | haemozoin formation                             | 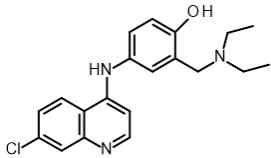   | Approved |
| AQ-13        | Dihydrochloride | assumed to be inhibition of haemozoin formation |    | Phase II |
| Artemether   | --              | not known (likely poly-pharmacology)            |    | Approved |
| Artemisone   | --              | not known (likely poly-pharmacology)            |  | Phase II |
| Artesunate   | Sodium          | prodrug                                         |  | Approved |
| Atovaquone   | --              | Pfycyt bc1 Qo                                   |  | Approved |
| Azithromycin | --              | 70S ribosome                                    |  | Approved |

|                     |               |                                                             |                                                                                      |                                                                                                   |
|---------------------|---------------|-------------------------------------------------------------|--------------------------------------------------------------------------------------|---------------------------------------------------------------------------------------------------|
| Chloroquine         | Diphosphate   | haemozoin formation                                         | 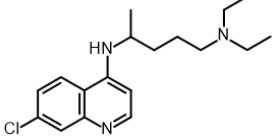   | Approved                                                                                          |
| Chlorproguanil      | Hydrochloride | Unknown (metabolite is Chlorcycloguanil - PfDHFR inhibitor) |    | Approved (withdrawn as part of the combination Lapdap)                                            |
| Clindamycin         | Hydrochloride | 70S ribosome                                                |    | Approved                                                                                          |
| Cycloguanil         | Nitrate       | PfDHFR                                                      |    | Active metabolite of proguanil                                                                    |
| Dapsone             | --            | PfDHPS                                                      |  | Approved (withdrawn as part of the combination Lapdap-dapsone showed unacceptable safety profile) |
| Dihydro-artemisinin | --            | not known (likely poly-pharmacology)                        |  | Approved                                                                                          |
| Doxycyclin          | Hyclate       | ribosome                                                    |  | Approved                                                                                          |
| DSM265              | --            | PfDHODH                                                     |  | Phase II                                                                                          |

|              |               |                            |                                                                                      |                                  |
|--------------|---------------|----------------------------|--------------------------------------------------------------------------------------|----------------------------------|
| DSM421       | --            | PfDHODH                    | 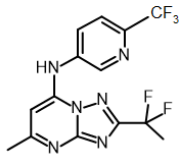   | Program stopped due to toxicity  |
| ELQ300       | --            | Pfcty bc1 Qi               |    | Preclinical                      |
| Ferroquine   | --            | haemozoin formation        |    | Phase II                         |
| Halofantrine | Hydrochloride | haemozoin formation        |   | Withdrawn due to safety concerns |
| JPC3210      | --            | not known                  |  | Preclinical                      |
| KAE609       | --            | PfATP4                     |  | Phase II                         |
| KAF156       | Hydrochloride | PfCARL (resistance marker) |  | Phase II                         |

|              |                       |                                      |                                                                                      |                      |
|--------------|-----------------------|--------------------------------------|--------------------------------------------------------------------------------------|----------------------|
| Lumefantrine | --                    | haemozoin formation                  | 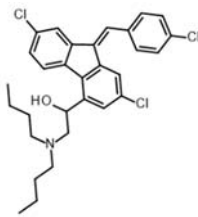   | Approved             |
| M5717        | Base or Fumarate      | PfeEF2                               |    | Phase I              |
| Mefloquine   | Hydrochloride         | haemozoin formation                  |    | Approved             |
| MMV048       | --                    | PfPI(4)K                             |  | Phase II             |
| MMV052       | Tosylate or Phosphate | not known (likely poly-pharmacology) |  | Program discontinued |
| MMV253       | --                    | V-type ATPase (resistance marker)    |  | Phase I              |

|                        |                |                                      |                                                                                      |                                                                        |
|------------------------|----------------|--------------------------------------|--------------------------------------------------------------------------------------|------------------------------------------------------------------------|
| Naphthoquine           | Diphosphate    | haemozoin formation                  | 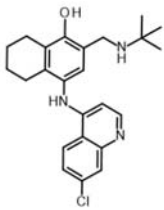   | No stringent regulatory approval but part of marketed combination ARCO |
| N-Desethyl-amodiaquine | --             | haemozoin formation                  |    | active metabolite of amodiaquine                                       |
| NPC1161B               | --             | not known                            |   | Preclinical                                                            |
| OZ277                  | Maleate        | not known (likely poly-pharmacology) |  | Approved (India)                                                       |
| OZ439                  | Mesylate       | not known (likely poly-pharmacology) |  | Phase II                                                               |
| P218                   | Hydrochloride  | PfDHFR                               |  | Phase I                                                                |
| Piperaquine            | Tetraphosphate | haemozoin formation                  |  | Approved                                                               |

|               |                         |                                         |                                                                                      |          |
|---------------|-------------------------|-----------------------------------------|--------------------------------------------------------------------------------------|----------|
| Primaquine    | Diphosphate             | not known                               | 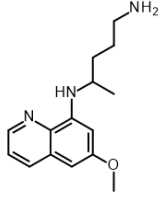   | Approved |
| Proguanil     | --                      | Unknown.<br>(metabolite is cycloguanil) |    | Approved |
| Pyrimethamine | --                      | PfDHFR                                  |    | Approved |
| Pyronaridine  | Tetraphosphate          | haemozoin formation                     |  | Approved |
| Quinine       | Sulfate (quinine dimer) | haemoglobin digestion                   |  | Approved |
| (+)-SJ733     | Base or Hydrochloride   | PfATP4                                  |  | Phase II |

|                  |                   |                                      |                                                                                      |                   |
|------------------|-------------------|--------------------------------------|--------------------------------------------------------------------------------------|-------------------|
| Sulfadoxine      | --                | PfDHPS                               | 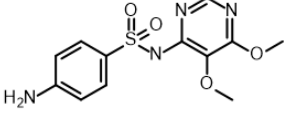   | Approved          |
| Sulfamethoxazole | --                | PfDHPS                               |    | Approved          |
| Tafenoquine      | Base or Succinate | not known                            |   | FDA Approved 2018 |
| TDD-E209         | Mesylate          | not known (likely poly-pharmacology) |  | Preclinical       |



**Table S2 Representative analytical conditions for quantitative analysis**

| Compound           | Column                                       | Mobile Phase / Flow rate (mL/min)                            | Gradient                   | Detection                                                               |
|--------------------|----------------------------------------------|--------------------------------------------------------------|----------------------------|-------------------------------------------------------------------------|
| Amodiaquine        | Ascentis Express Amide (50 x 2.1 mm, 2.7 µm) | ACN/water (0.05% formic acid) / 0.4                          | 0-60% ACN over 4 min       | ESI positive MRM; m/z 356.18 > 283.0; Cone 35 V; CID 25 V <sup>a</sup>  |
| AQ-13              | Ascentis Express Amide (50 x 2.1 mm, 2.7 µm) | MeOH/water (2.5 mM ammonium formate, 5 mM formic acid) / 0.4 | 20-95% Methanol over 4 min | ESI positive MRM; m/z 292.23 > 113.96; Cone 35 V; CID 20 V <sup>a</sup> |
| Artemether         | Ascentis Express Amide (50 x 2.1 mm, 2.7 µm) | ACN/water (0.05% formic acid) / 0.4                          | 2-95% ACN over 4 min       | ESI positive MRM; m/z 267.08 > 162.85; Cone 40 V; CID 45 V              |
| Artemisone         | Ascentis Express Amide (50 x 2.1 mm, 2.7 µm) | ACN/water (0.05% formic acid) / 0.4                          | 20-95% ACN over 4 min      | ESI positive MRM; m/z 402.45 > 163.15; Cone 30 V; CID 18 V              |
| Artesunate         | Ascentis Express Amide (50 x 2.1 mm, 2.7 µm) | ACN/water (0.05% formic acid) / 0.4                          | 10-95% ACN over 4 min      | ESI positive MRM; m/z 267.21 > 163.11; Cone 30 V; CID 7 V               |
| Atovaquone         | Ascentis Express Amide (50 x 2.1 mm, 2.7 µm) | ACN/water (5 mM ammonium formate) / 0.4                      | 60-95% ACN over 4 min      | ESI positive MRM; m/z 365.02 > 336.89; Cone 50 V; CID 30 V              |
| Azithromycin       | Ascentis Express Amide (50 x 2.1 mm, 2.7 µm) | MeOH/water (5 mM ammonium formate) / 0.4                     | 2-95% Methanol over 4 min  | ESI positive MRM; m/z 749.56 > 116.03; Cone 45 V; CID 40 V <sup>a</sup> |
| Chloroquine        | Ascentis Express Amide (50 x 2.1 mm, 2.7 µm) | ACN/water (0.05% formic acid) / 0.4                          | 0-70% ACN over 4 min       | ESI positive MRM; m/z 320.24 > 247.14; Cone 35 V; CID 20 V              |
| Chlorproguanil     | Ascentis Express Amide (50 x 2.1 mm, 2.7 µm) | ACN/water (0.05% formic acid) / 0.4                          | 10-80% ACN over 4 min      | ESI positive MRM; m/z 288.15 > 203.97; Cone 30 V; CID 18 V              |
| Clindamycin        | Ascentis Express Amide (50 x 2.1 mm, 2.7 µm) | ACN/water (0.05% formic acid) / 0.4                          | 5-60% ACN over 4 min       | ESI positive MRM; m/z 425.07 > 125.93; Cone 30 V; CID 30 V <sup>a</sup> |
| Cycloguanil        | Ascentis Express Amide (50 x 2.1 mm, 2.7 µm) | ACN/water (0.05% formic acid) / 0.4                          | 5-60% ACN over 4 min       | ESI positive MRM; m/z 252.31 > 195.03; Cone 30 V; CID 20 V <sup>a</sup> |
| Dapsone            | Ascentis Express Amide (50 x 2.1 mm, 2.7 µm) | ACN/water (0.05% formic acid) / 0.4                          | 10-80% ACN over 4 min      | ESI positive MRM; m/z 249.20 > 155.95; Cone 30 V; CID 15 V              |
| Dihydroartemisinin | Ascentis Express Amide (50 x 2.1 mm, 2.7 µm) | ACN/water (0.05% formic acid) / 0.4                          | 2-95% ACN over 4 min       | ESI positive MRM; m/z 267.15 > 163.24; Cone 40 V; CID 45 V              |
| Doxycyclin         | Ascentis Express Amide (50 x 2.1 mm, 2.7 µm) | ACN/water (0.05% formic acid) / 0.4                          | 10-80% ACN over 4 min      | ESI positive MRM; m/z 445.23 > 428.08; Cone 30 V; CID 18 V <sup>a</sup> |
| DSM265             | Ascentis Express Amide (50 x 2.1 mm, 2.7 µm) | ACN/water (0.05% formic acid) / 0.4                          | 10-70% ACN over 4 min      | ESI positive MRM; m/z 416.05 > 152.82; Cone 45 V; CID 35 V              |
| DSM421             | Ascentis Express Amide (50 x 2.1 mm, 2.7 µm) | ACN/water (0.05% formic acid) / 0.4                          | 10-95% ACN over 4 min      | ESI positive MRM; m/z 359.56 > 153.37; Cone 40 V; CID 30 V              |

| Compound              | Column                                       | Mobile Phase / Flow rate (mL/min)        | Gradient                  | Detection                                                               |
|-----------------------|----------------------------------------------|------------------------------------------|---------------------------|-------------------------------------------------------------------------|
| ELQ300                | Ascentis Express Amide (50 x 2.1 mm, 2.7 µm) | ACN/water (0.05% formic acid) / 0.4      | 10-95% ACN over 4 min     | ESI positive MRM; m/z 476.10 > 433.0; Cone 50 V; CID 40 V               |
| Ferroquine            | Ascentis Express Amide (50 x 2.1 mm, 2.7 µm) | ACN/water (0.05% formic acid) / 0.4      | 2-95% ACN over 4 min      | ESI positive MRM; m/z 434.0 > 389.0; Cone 25 V; CID 20 V                |
| Halofantrine          | Ascentis Express Amide (50 x 2.1 mm, 2.7 µm) | ACN/water (0.05% formic acid) / 0.4      | 10-70% ACN over 4 min     | ESI positive MRM; m/z 500.22 > 142.18; Cone 40 V; CID 25 V <sup>a</sup> |
| JPC3210               | Ascentis Express Amide (50 x 2.1 mm, 2.7 µm) | ACN/water (0.05% formic acid) / 0.4      | 5-70% ACN over 4 min      | ESI positive MRM; m/z 399.24 > 326.25; Cone 40 V; CID 25 V <sup>a</sup> |
| KAE609                | Ascentis Express Amide (50 x 2.1 mm, 2.7 µm) | ACN/water (0.05% formic acid) / 0.4      | 0-70% ACN over 4 min      | ESI positive MRM; m/z 390.18 > 347.02; Cone 30 V; CID 15 V <sup>a</sup> |
| KAF156                | Ascentis Express Amide (50 x 2.1 mm, 2.7 µm) | ACN/water (0.05% formic acid) / 0.4      | 10-70% ACN over 4 min     | ESI positive MRM; m/z 412.24 > 100.80; Cone 40 V; CID 25 V <sup>a</sup> |
| Lumefantrine          | Ascentis Express Amide (50 x 2.1 mm, 2.7 µm) | ACN/water (0.05% formic acid) / 0.4      | 10-70% ACN over 4 min     | ESI positive MRM; m/z 528.01 > 510.12; Cone 40 V; CID 25 V              |
| M5717                 | Ascentis Express Amide (50 x 2.1 mm, 2.7 µm) | MeOH/water (5 mM ammonium formate) / 0.4 | 5-95% Methanol over 4 min | ESI positive MRM; m/z 463.37 > 392.24; Cone 45 V; CID 30 V <sup>a</sup> |
| Mefloquine            | Ascentis Express Amide (50 x 2.1 mm, 2.7 µm) | ACN/water (0.05% formic acid) / 0.4      | 10-60% ACN over 4 min     | ESI positive MRM; m/z 379.10 > 361.20; Cone 40 V; CID 35 V              |
| MMV048                | Ascentis Express Amide (50 x 2.1 mm, 2.7 µm) | ACN/water (0.05% formic acid) / 0.4      | 10-70% ACN over 4 min     | ESI positive MRM; m/z 393.96 > 315.12; Cone 45 V; CID 35 V              |
| MMV052                | Ascentis Express Amide (50 x 2.1 mm, 2.7 µm) | ACN/water (0.05% formic acid) / 0.4      | 5-95% ACN over 4 min      | ESI positive MRM; m/z 526.42 > 360.26; Cone 35 V; CID 40 V <sup>a</sup> |
| MMV253                | Ascentis Express Amide (50 x 2.1 mm, 2.7 µm) | ACN/water (0.05% formic acid) / 0.4      | 5-80% ACN over 4 min      | ESI positive MRM; m/z 466.09 > 395.05; Cone 40 V; CID 29 V <sup>a</sup> |
| Naphthoquine          | Ascentis Express Amide (50 x 2.1 mm, 2.7 µm) | ACN/water (0.05% formic acid) / 0.4      | 0-60% ACN over 4 min      | ESI positive MRM; m/z 410.16 > 337.18; Cone 50 V; CID 25 V <sup>a</sup> |
| N-Desethylamodiaquine | Ascentis Express Amide (50 x 2.1 mm, 2.7 µm) | ACN/water (0.05% formic acid) / 0.4      | 0-95% ACN over 4 min      | ESI positive MRM; m/z 328.07 > 283.09; Cone 30 V; CID 15 V <sup>a</sup> |
| NPC1161B              | Ascentis Express Amide (50 x 2.1 mm, 2.7 µm) | ACN/water (0.05% formic acid) / 0.4      | 20-95% ACN over 4 min     | ESI positive MRM; m/z 434.10 > 86.16; Cone 30 V; CID 20 V               |
| OZ277                 | Ascentis Express Amide (50 x 2.1 mm, 2.7 µm) | ACN/water (0.05% formic acid) / 0.4      | 0-95% ACN over 4 min      | ESI positive MRM; m/z 393.28 > 227.22; Cone 25 V; CID 15 V              |
| OZ439                 | Ascentis Express Amide (50 x 2.1 mm, 2.7 µm) | ACN/water (0.05% formic acid) / 0.4      | 2-95% ACN over 4 min      | ESI positive MRM; m/z 470.21 > 303.88; Cone 35 V; CID 35 V              |
| P218                  | Ascentis Express Amide (50 x 2.1 mm, 2.7 µm) | ACN/water (0.05% formic acid) / 0.4      | 5-60% ACN over 4 min      | ESI positive MRM; m/z 361.10 > 155.05; Cone 45 V; CID 40 V              |

| Compound         | Column                                         | Mobile Phase / Flow rate (mL/min)   | Gradient              | Detection                                                               |
|------------------|------------------------------------------------|-------------------------------------|-----------------------|-------------------------------------------------------------------------|
| Piperaquine      | Ascentis Express Amide (50 x 2.1 mm, 2.7 µm)   | ACN/water (0.05% formic acid) / 0.4 | 0-95% ACN over 4 min  | ESI positive MRM; m/z 535.15 > 288.11; Cone 45 V; CID 35 V <sup>a</sup> |
| Primaquine       | Ascentis Express Amide (50 x 2.1 mm, 2.7 µm)   | ACN/water (0.05% formic acid) / 0.4 | 10-70% ACN over 4 min | ESI positive MRM; m/z 260.28 > 85.96; Cone 25 V; CID 15 V               |
| Proguanil        | Phenomenex Synergi Polar (50 x 2.0 mm, 2.5 µm) | ACN/water (0.05% formic acid) / 0.4 | 0-95% ACN over 4 min  | ESI positive MRM; m/z 254.20 > 102.04; Cone 40 V; CID 25 V              |
| Pyrimethamine    | Ascentis Express Amide (50 x 2.1 mm, 2.7 µm)   | ACN/water (0.05% formic acid) / 0.4 | 10-80% ACN over 4 min | ESI positive MRM; m/z 249.27 > 176.95; Cone 30 V; CID 30 V              |
| Pyronaridine     | Ascentis Express Amide (50 x 2.1 mm, 2.7 µm)   | ACN/water (0.05% formic acid) / 0.6 | 0-95% ACN over 4 min  | ESI positive MRM; m/z 518.22 > 447.13; Cone 30 V; CID 20 V <sup>a</sup> |
| Quinine          | Ascentis Express Amide (50 x 2.1 mm, 2.7 µm)   | ACN/water (0.05% formic acid) / 0.4 | 5-60% ACN over 4 min  | ESI positive MRM; m/z 325.25 > 81.04; Cone 30 V; CID 30 V <sup>a</sup>  |
| SJ733            | Ascentis Express Amide (50 x 2.1 mm, 2.7 µm)   | ACN/water (0.05% formic acid) / 0.4 | 2-95% ACN over 4 min  | ESI positive MRM; m/z 468.97 > 189.04; Cone 40 V; CID 30 V <sup>a</sup> |
| Sulfadoxine      | Ascentis Express Amide (50 x 2.1 mm, 2.7 µm)   | ACN/water (0.05% formic acid) / 0.4 | 10-70% ACN over 4 min | ESI positive MRM; m/z 311.15 > 155.89; Cone 35 V; CID 16 V              |
| Sulfamethoxazole | Ascentis Express Amide (50 x 2.1 mm, 2.7 µm)   | ACN/water (0.05% formic acid) / 0.4 | 10-80% ACN over 4 min | ESI positive MRM; m/z 254.13 > 155.89; Cone 30 V; CID 15 V              |
| Tafenoquine      | Ascentis Express Amide (50 x 2.1 mm, 2.7 µm)   | ACN/water (0.05% formic acid) / 0.4 | 10-70% ACN over 4 min | ESI positive MRM; m/z 464.28 > 85.90; Cone 35 V; CID 20 V <sup>a</sup>  |
| TDD-E209         | Ascentis Express Amide (50 x 2.1 mm, 2.7 µm)   | ACN/water (0.05% formic acid) / 0.4 | 2-95% ACN over 4 min  | ESI positive MRM; m/z 502.21 > 130.06; Cone 40 V; CID 25 V <sup>a</sup> |

<sup>a</sup> metabolism samples analyzed by ESI positive MS<sup>E</sup> with a cone voltage of 30-35 V

**Table S3** Representative assay validation data for quantitative methods. Calibration standards were prepared in the same matrix as the study samples for all assays.

| Compound              | Accuracy | Rel. S.D. | Recovery <sup>a</sup> | LLQ range (ng/mL) |
|-----------------------|----------|-----------|-----------------------|-------------------|
| Amodiaquine           | ± 6%     | < 7%      | > 90%                 | 1-5               |
| AQ-13                 | ± 6%     | < 8%      | > 85%                 | 1-5               |
| Artemether            | ± 7%     | < 10%     | > 99%                 | 10-50             |
| Artemisone            | ± 13%    | < 5%      | > 90%                 | 5                 |
| Artesunate            | ± 11%    | < 11%     | > 95%                 | 2.5-5             |
| Atovaquone            | ± 13%    | < 12%     | > 90%                 | 2.5-5             |
| Azithromycin          | ± 15%    | < 13%     | > 85%                 | 1-5               |
| Chloroquine           | ± 10%    | < 12%     | > 95%                 | 1-5               |
| Chlorproguanil        | ± 7%     | < 8%      | > 80%                 | 1                 |
| Clindamycin           | ± 12%    | < 6%      | > 90%                 | 1                 |
| Cycloguanil           | ± 10%    | < 10%     | > 95%                 | 1                 |
| Dapsone               | ± 9%     | < 7%      | > 90%                 | 1-5               |
| Dihydroartemisinin    | ± 7%     | < 12%     | > 99%                 | 2.5-5             |
| Doxycyclin            | ± 7%     | < 13%     | > 90%                 | 1-5               |
| DSM265                | ± 12%    | < 12%     | > 80%                 | 1-5               |
| DSM421                | ± 9%     | < 8%      | > 99%                 | 10                |
| ELQ300                | ± 13%    | < 13%     | > 85%                 | 0.5-5             |
| Ferroquine            | ± 7%     | < 10%     | > 90%                 | 1-5               |
| Halofantrine          | ± 11%    | < 10%     | > 95%                 | 0.5-5             |
| JPC3210               | ± 6%     | < 9%      | > 95%                 | 0.5-5             |
| KAE609                | ± 9%     | < 13%     | > 95%                 | 5-10              |
| KAF156                | ± 15%    | < 14%     | > 94%                 | 5-10              |
| Lumefantrine          | ± 13%    | < 10%     | > 95%                 | 2-5               |
| M5717                 | ± 11%    | < 6%      | > 90%                 | 5                 |
| Mefloquine            | ± 6%     | < 8%      | > 80%                 | 1-5               |
| MMV048                | ± 7%     | < 9%      | > 90%                 | 1-5               |
| MMV052                | ± 7%     | < 6%      | > 90%                 | 1                 |
| MMV253                | ± 14%    | < 12%     | > 95%                 | 5-10              |
| N-Desethylamodiaquine | ± 10%    | < 12%     | > 85%                 | 10-50             |
| Naphthoquine          | ± 12%    | < 10%     | > 70%                 | 1                 |
| NPC1161B              | ± 10%    | < 7%      | > 95%                 | 2-10              |
| OZ277                 | ± 6%     | < 7%      | > 50%                 | 1                 |
| OZ439                 | ± 11%    | < 8%      | > 95%                 | 1                 |
| P218                  | ± 12%    | < 3%      | > 80%                 | 1-5               |
| Piperaquine           | ± 6%     | < 12%     | > 95%                 | 5-50              |
| Primaquine            | ± 11%    | < 12%     | > 70%                 | 1-5               |
| Proguanil             | ± 6%     | < 7%      | > 90%                 | 1-2.5             |
| Pyrimethamine         | ± 12%    | < 7%      | > 80%                 | 1-5               |
| Pyronaridine          | ± 6%     | < 16%     | > 90%                 | 50-100            |
| Quinine               | ± 8%     | < 13%     | > 90%                 | 20-50             |
| Sulfadoxine           | ± 6%     | < 15%     | > 80%                 | 1                 |
| Sulfamethoxazole      | ± 8%     | < 7%      | > 85%                 | 1-10              |
| SJ733                 | ± 6%     | < 6%      | > 95%                 | 0.5-1             |
| Tafenoquine           | ± 8%     | < 11%     | > 99%                 | 2.5-10            |
| TDD-E209              | ± 11%    | < 13%     | > 95%                 | 1-5               |

<sup>a</sup> Recovery data are typically for assays using plasma or mixed matrices (e.g. plasma/buffer or plasma/whole blood)

**Table S4 Metabolic pathways and positive control inhibitors. Data for  $K_m$  represent the fitted values (S.E. of the estimate).**

| CYP isoform | Microsomal protein (mg/mL) | Incubation time (min) | Substrate (concentration)           | Metabolic pathway                     | Measured $K_m$ ( $\mu\text{M}$ ) <sup>a</sup> | Literature $K_m$ ( $\mu\text{M}$ ) (range) | Positive control inhibitor |
|-------------|----------------------------|-----------------------|-------------------------------------|---------------------------------------|-----------------------------------------------|--------------------------------------------|----------------------------|
| CYP1A2      | 0.1                        | 30                    | phenacetin (40 $\mu\text{M}$ )      | phenacetin O-deethylation             | 57.6 (4.6)                                    | 47 [1] (9 – 68) <sup>b</sup>               | furafylline                |
| CYP2C9      | 0.2                        | 30                    | tolbutamide (140 $\mu\text{M}$ )    | tolbutamide methylhydroxylation       | 371 (13)                                      | 147 [1] (60 – 580) <sup>b</sup>            | sulfaphenazole             |
| CYP2C19     | 0.2                        | 40                    | (S)-mephenytoin (30 $\mu\text{M}$ ) | (S)-mephenytoin 4'-hydroxylation      | 44.0 (4.1)                                    | 57.2 [1] (23 – 169) <sup>b</sup>           | ticlopidine                |
| CYP2D6      | 0.1                        | 15                    | dextromethorphan (2 $\mu\text{M}$ ) | dextromethorphan O-demethylation      | 3.28 (0.51)                                   | 4.64 [1] (2.8 – 22) <sup>b</sup>           | quinidine                  |
| CYP3A4      | 0.1                        | 10                    | midazolam (1.25 $\mu\text{M}$ )     | midazolam 1'-hydroxylation            | 1.82 (0.12)                                   | 2.27 [1] (2.4 – 12) <sup>b</sup>           | ketoconazole               |
| CYP3A4      | 0.1                        | 10                    | testosterone (20 $\mu\text{M}$ )    | testosterone 6 $\beta$ -hydroxylation | 49.7 (10)                                     | 46.4 [1] (31 – 206) <sup>b</sup>           | ketoconazole               |

<sup>a</sup>  $K_m$  values for each CYP-specific biotransformation were determined under the same incubation conditions as was used for the assessment of CYP inhibition (see Methods, main text). Initial rates of metabolite formation (confirmed based on linearity of product formation with respect to time) were assessed over a range of substrate concentrations spanning approximately 10-fold below to >6-fold above the anticipated  $K_m$ . Enzyme kinetic parameters were determined by fitting the standard Michaelis-Menten model using GraphPad Prism (v 7) software.

<sup>b</sup> [1] and references therein

**Table S5 Analytical conditions used for CYP inhibition studies**

| Metabolite                       | Column                                            | Mobile Phase / Flow rate (mL/min)   | Gradient               | Detection                                                     |
|----------------------------------|---------------------------------------------------|-------------------------------------|------------------------|---------------------------------------------------------------|
| paracetamol                      | Ascentis Express Amide (50 x 2.1 mm, 2.7 $\mu$ m) | ACN/water (0.05% formic acid) / 0.6 | 0-70% ACN over 2.5 min | ESI positive MRM; m/z 152.08 > 110.04;<br>Cone 35 V; CID 25 V |
| methylhydroxy-tolbutamide        | Ascentis Express Amide (50 x 2.1 mm, 2.7 $\mu$ m) | ACN/water (0.05% formic acid) / 0.6 | 0-70% ACN over 2.5 min | ESI positive MRM; m/z 287.03 > 74.05;<br>Cone 35 V; CID 25 V  |
| 4'-Hydroxy- mephenytoin          | Ascentis Express Amide (50 x 2.1 mm, 2.7 $\mu$ m) | ACN/water (0.05% formic acid) / 0.6 | 0-70% ACN over 2.5 min | ESI positive MRM; m/z 235.10 > 150.22;<br>Cone 40 V; CID 25 V |
| dextrorphan                      | Ascentis Express Amide (50 x 2.1 mm, 2.7 $\mu$ m) | ACN/water (0.05% formic acid) / 0.6 | 0-70% ACN over 2.5 min | ESI positive MRM; m/z 257.90 > 157.07;<br>Cone 50 V; CID 50 V |
| 1-hydroxy-midazolam              | Ascentis Express Amide (50 x 2.1 mm, 2.7 $\mu$ m) | ACN/water (0.05% formic acid) / 0.6 | 0-70% ACN over 2.5 min | ESI positive MRM; m/z 341.83 > 324.07;<br>Cone 50 V; CID 35 V |
| 6 $\beta$ -hydroxy- testosterone | Ascentis Express Amide (50 x 2.1 mm, 2.7 $\mu$ m) | ACN/water (0.05% formic acid) / 0.6 | 0-70% ACN over 2.5 min | ESI positive MRM; m/z 305.12 > 269.10;<br>Cone 40 V; CID 15 V |

**Table S6** Calculated pKa and Log D values using ChemAxon or ACD Labs

| Compound              | calculated pKa<br>ChemAxon / ACD                           | Calculated Log D <sub>7.4</sub><br>ChemAxon / ACD <sup>a</sup> |
|-----------------------|------------------------------------------------------------|----------------------------------------------------------------|
| Amodiaquine           | 10.2 (B), 6.5 (B), 9.1 (A) /<br>5.6 (B), 9.4 (A)           | 2.32 / 0.95                                                    |
| AQ-13                 | 9.9 (B), 7.3 (B) / 10.3 (B)                                | 0.26 / 0.91                                                    |
| Artemether            | -- / --                                                    | 3.48 / 2.82                                                    |
| Artemisone            | 2.1 (B) / 2.99                                             | 2.21 / 2.89                                                    |
| Artesunate            | 3.8 (A) / 4.3 (A)                                          | -0.17 / 0.26                                                   |
| Atovaquone            | 8.2 (A) / 5.0 (A)                                          | 3.33 / 4.11                                                    |
| Azithromycin          | 8.7 (B), 7.6 (B) / 8.6 (B)                                 | -1.23 / 0.66                                                   |
| Chloroquine           | 9.6 (B), 8.9 (B) / 10.5 (B)                                | 0.88 / 1.59                                                    |
| Chlorproguanil        | 10.0 (B), 7.7 (B) / 10.8 (B)                               | 0.31 / 2.12                                                    |
| Clindamycin           | 7.6 (B) / 8.7 (B)                                          | 0.65 / 0.70                                                    |
| Cycloguanil           | 8.2 (B), 5.9 (B) / 9.3 (B)                                 | 0.86 / -0.69                                                   |
| Dapsone               | 2.4 (B) / 1.2 (B)                                          | 1.27 / 0.99                                                    |
| Dihydroartemisinin    | -- / --                                                    | 2.84 / 2.19                                                    |
| Doxycyclin            | 7.8 (B), 4.7 (A) / 10.8 (B), 4.5 (A)                       | -3.57 / -1.1                                                   |
| DSM265                | <2 / 2.4 (B)                                               | 5.68 / 2.63                                                    |
| DSM421                | <2 / NA                                                    | 3.34 / NA                                                      |
| ELQ300                | -- / --                                                    | 7.20 / 6.2                                                     |
| Ferroquine            | 9.0 (B), 7.3 (B) / NA                                      | 1.72 / NA                                                      |
| Halofantrine          | 10.1 (B) / 9.4 (B)                                         | 5.46 / 6.93                                                    |
| JPC3210               | 10.7 (B), 7.9 (A) / NA                                     | 3.96 / NA                                                      |
| KAE609                | 6.5 (B) / 6.1 (B)                                          | 4.11 / 4.11                                                    |
| KAF156                | 8.1 (B), 5.7 (B) / 8.0 (B)                                 | 2.26 / 2.40                                                    |
| Lumefantrine          | 9.8 (B) / 8.7 (B)                                          | 6.84 / 7.42                                                    |
| M5717                 | 8.5 (B), 7.1 (B) / NA                                      | 2.28 / NA                                                      |
| Mefloquine            | 9.5 (B) / 9.2 (B)                                          | 2.07 / 0.50                                                    |
| MMV048                | 5.9 (B) / 3.8 (B)                                          | 2.69 / 0.64                                                    |
| MMV052                | 10.1 (B) / NA                                              | 3.35 / NA                                                      |
| MMV253                | 7.5 (B), 4.4 (B), 3.4 (B), 11.9 (A) / NA                   | 3.86 / NA                                                      |
| N-Desethylamodiaquine | 10.6 (B), 6.5 (B), 9.2 (A) / NA                            | 1.43 / NA                                                      |
| Naphthoquine          | 10.8 (B), 6.5 (B), 9.6 (A) / NA                            | 3.35 / NA                                                      |
| NPC1161B              | 10.5 (B), 5.0 (B) / 10.4 (B)                               | 2.26 / 2.67                                                    |
| OZ277                 | 9.6 (B) / 9.1 (B)                                          | 0.94 / 0.15                                                    |
| OZ439                 | 6.7 (B) / 6.5 (B)                                          | 5.36 / 4.37                                                    |
| P218                  | 7.6 (B), 4.3 (A) / 7.0 (B), 4.7 (A)                        | -0.20 / -1.32                                                  |
| Piperaquine           | 8.8 (B), 7.4 (B), 6.8 (B) / 8.9 (B)                        | 3.87 / 5.63                                                    |
| Primaquine            | 10.2 (B), 4.1 (B) / 10.4 (B)                               | -0.96 / 0.01                                                   |
| Proguanil             | 10.4 (B), 8.2 (B) / 11.1 (B)                               | -0.78 / 1.13                                                   |
| Pyrimethamine         | 7.8 (B) / 7.2 (B)                                          | 2.23 / 2.55                                                    |
| Pyronaridine          | 10.2 (B), 9.2 (B), 5.9 (B), 8.0 (A) /<br>10.2 (B), 8.2 (A) | 2.08 / 1.15                                                    |
| Quinine               | 9.0 (B), 4.0 (B) / 9.3 (B)                                 | 0.86 / 0.98                                                    |
| SJ733                 | 4.8 (B) / NA                                               | 3.64 / NA                                                      |
| Sulfadoxine           | 2.6 (B), 6.10 (A) / 2.2 (B), 6.2 (A)                       | -0.22 / -1.38                                                  |
| Sulfamethoxazole      | 6.2 (A) / 5.8 (A)                                          | 0.00 / -0.54                                                   |
| Tafenoquine           | 10.2 (B), 3.2 (B) / 10.4 (B)                               | 2.37 / 3.09                                                    |
| TDD-E209              | 8.4 (B) / NA                                               | 4.99 / NA                                                      |

<sup>a</sup> ACD values were obtained from ChEMBL (<https://www.ebi.ac.uk/chembl/>)

**Table S7 Permeability data for control compounds across Caco-2 cell monolayers over the course of the study.**

| Compound       | $P_{app}$ ( $10^{-6}$ cm/s) <sup>a</sup> |                       | Efflux Ratio Range |
|----------------|------------------------------------------|-----------------------|--------------------|
|                | A – B Range                              | B – A Range           |                    |
| Lucifer Yellow | <2                                       | Not assessed          | --                 |
| Propranolol    | 29 – 41                                  | 35 – 42 <sup>c</sup>  | 0.9 – 1.0          |
| Rhodamine 123  | 0.7 - 1.6                                | 10 – 28               | 6 – 39             |
| Compound       | $P_{app}$ ( $10^{-6}$ cm/s) <sup>b</sup> |                       | Efflux Ratio Range |
|                | A – B Range                              | B – A Range           |                    |
| Lucifer Yellow | <3                                       | Not assessed          | --                 |
| Propranolol    | 78 – 121                                 | 81 – 107 <sup>c</sup> | 0.9 – 1.4          |
| Rhodamine 123  | 0.6 – 1.7                                | 9 – 31                | 11 – 21            |

<sup>a</sup> pH 7.4 buffer as medium

<sup>b</sup> plasma as transport medium

<sup>c</sup> B-A  $P_{app}$  for propranolol not assessed in all experiments



**Table S8 Fraction unbound in human plasma for control compounds using the different methods. Data represent the mean (S.D.) for 3-4 technical replicates (UC) or 3-4 individual dialysis units (RED).**

| Compound<br>(Log D <sub>7.4</sub> ) | Log D <sub>7.4</sub> | f <sub>u</sub> – UC<br>(neat plasma) | f <sub>u</sub> – RED<br>(neat plasma, 6 h<br>incubation)  | f <sub>u</sub> – RED<br>(10% plasma; 6 h<br>dialysis) | f <sub>u</sub> – RED<br>(10% plasma; 24 h<br>dialysis with<br>presaturation) | Literature f <sub>u</sub> , Method                                                                        |
|-------------------------------------|----------------------|--------------------------------------|-----------------------------------------------------------|-------------------------------------------------------|------------------------------------------------------------------------------|-----------------------------------------------------------------------------------------------------------|
| Propranolol                         | 0.36                 | 0.29 (0.016)                         | 0.32 (0.0096)                                             | 0.29 (0.082)                                          | 0.17 (0.0038)                                                                | 0.101 (0.013), UC [2]<br>0.231 (0.046), RED [3]                                                           |
| (RS)-ketoprofen                     | 0.39                 | 0.010 (0.001)                        | 0.0074 (0.0001) <sup>a</sup>                              | 0.012 (0.001) <sup>a</sup>                            | 0.0048 (0.0004)                                                              | 0.013 (0.002), ED [4]                                                                                     |
| warfarin                            | 0.94                 | 0.010 (0.001)                        | 0.012 (0.001)<br>0.0060 (0.0011) <sup>a</sup>             | 0.013 (0.001)<br>0.0047 (0.0002)                      | 0.0047 (n=2) <sup>a</sup>                                                    | 0.010 (0.001), UC [2]<br>0.014 (0.003), RED [3]<br>0.015 (0.003) (R), ED [5]<br>0.012 (0.002) (S), ED [5] |
| Saquinavir                          | 2.05                 | 0.053 (0.011) <sup>b</sup>           | 0.0069 (0.00080) <sup>a</sup>                             | 0.0077 (0.0007) <sup>a</sup>                          | 0.0077 (0.0007)                                                              | 0.014 (0.001), ED [5]                                                                                     |
| verapamil                           | 2.79                 | 0.200 (0.009)                        | 0.130 (0.011) <sup>c</sup><br>0.092 (0.0013) <sup>a</sup> | 0.140 (0.011) <sup>c</sup>                            | 0.085 (0.012) <sup>a</sup>                                                   | 0.123 (0.0003), UC [2]<br>0.160 (0.016), RED [3]                                                          |
| ketoconazole                        | 4.13                 | 0.018 (0.001)                        | 0.0072 (0.0009)                                           | 0.011 (0.0005)                                        | 0.0066 (0.0013)                                                              | 0.018 (0.001), ED [5]                                                                                     |

UC=ultracentrifugation

RED=rapid equilibrium dialysis

ED=equilibrium dialysis

<sup>a,c</sup> same batches of plasma used for these measurements

<sup>b</sup> likely an overestimation of the fraction unbound

**Table S9 Fraction unbound in human plasma for antimalarial compounds using different methods (where assessed). Data represent the mean (S.D.) for 3-4 technical replicates; duplicate values represent independent experiments.**

| Compound              | $f_u$ – UC<br>(neat plasma)  | $f_u$ – RED<br>(10% plasma; 6 h dialysis) | $f_u$ – RED<br>(10% plasma; 24 h dialysis<br>with presaturation) | Literature $f_u$ ,<br>Method |
|-----------------------|------------------------------|-------------------------------------------|------------------------------------------------------------------|------------------------------|
| Amodiaquine           | 0.089 (0.0080)               | 0.086 (0.0027)                            | Not assessed                                                     | <0.1, ND [6]                 |
| AQ-13                 | 0.43 (0.022)                 | Not assessed                              | Not assessed                                                     | 0.45, UF [7]                 |
| Artemether            | 0.10 (0.018)                 | Not assessed                              | 0.038 (0.0090)<br>0.066 (0.0090)                                 | 0.046, EP [8]                |
| Atovaquone            | 0.0020 (0.00020)             | <0.0002                                   | <0.0001                                                          | 0.001 [9]                    |
| Azithromycin          | 0.71 (0.059)                 | 0.34, 0.35                                | Not assessed                                                     | 0.5-0.88, ED [10]            |
| Chloroquine           | 0.54 (0.048)<br>0.61 (0.023) | Not assessed                              | Not assessed                                                     | 0.54, ED [11]                |
| Clindamycin           | 0.19 (0.011)                 | Not assessed                              | Not assessed                                                     | 0.06, UF [12]                |
| Dapsone               | 0.27 (0.019)                 | Not assessed                              | Not assessed                                                     | 0.26, UF [13]                |
| Dihydroartemisinin    | 0.21 (0.010)                 | Not assessed                              | Not assessed                                                     | 0.092, UF [14]               |
| Doxycyclin            | 0.23 (0.090)                 | Not assessed                              | Not assessed                                                     | 0.12, ED [15]                |
| DSM265                | 0.0080 (0.0010)              | 0.0020 (0.0001)                           | 0.0018 (0.00010)                                                 | Not available                |
| DSM421                | 0.039 (0.0070)               | 0.035 (0.0044)                            | Not assessed                                                     | Not available                |
| ELQ300                | 0.011 (0.0020)               | <0.0001                                   | 0.00010 (0.000010)                                               | Not available                |
| Ferroquine            | 0.070 (0.0080)               | Not assessed                              | 0.041 (0.0010)                                                   | Not available                |
| Halofantrine          | 0.13 (0.032)                 | <0.0001                                   | <0.0001                                                          | Not available                |
| JPC3210               | 0.071 (n=2)                  | 0.0011 (0.0002)                           | 0.0028 (0.00020)<br>0.0020 (0.00010)                             | 0.024, UF [16]               |
| KAE609                | 0.057 (0.0050)               | 0.0020 (0.0002)                           | 0.0016 (0.00010)                                                 | Not available                |
| KAF156                | 0.11 (0.0080)                | 0.069 (0.013)                             | Not assessed                                                     | Not available                |
| Lumefantrine          | not assessed                 | <0.0001                                   | <0.0001                                                          | 0.003, EP [8]                |
| M5717                 | 0.34 (0.021)                 | 0.24 (0.0020)                             | Not assessed                                                     | 0.23, ED [17]                |
| Mefloquine            | 0.058 (0.0020)               | 0.015 (0.0010)                            | Not assessed                                                     | 0.02, ND [18]                |
| MMV048                | 0.17 (0.0050)                | 0.110 (0.0070)                            | Not assessed                                                     | Not available                |
| MMV052                | 0.058 (0.011)                | <0.0001                                   | 0.00040 (0.00010)<br>0.00023 (0.00003)                           | Not available                |
| MMV253                | 0.067 (0.0050)               | Not assessed                              | 0.017 (0.00020)                                                  | Not available                |
| N-Desethylamodiaquine | 0.17 (0.0020)                | Not assessed                              | Not assessed                                                     | 0.18, UF [16]                |
| Naphthoquine          | 0.030 (0.0020)               | 0.019 (0.0010)                            | 0.018 (0.0010)                                                   | Not available                |
| NPC1161B              | 0.046 (0.0090)               | <0.0003                                   | 0.00074 (0.00016)                                                | Not available                |
| OZ277                 | 0.086 (0.0080)               | 0.056 (0.0037)                            | Not assessed                                                     | Not available                |
| OZ439                 | 0.099 (0.024)                | <0.0001                                   | <0.0001                                                          | Not available                |
| Piperaquine           | 0.042 (0.0060)               | <0.001                                    | 0.0003 (0.0001)                                                  | <0.001, ND [19]              |
| Primaquine            | 0.26 (0.023)                 | Not assessed                              | Not assessed                                                     | 0.35-0.55, ND [9]            |
| Proguanil             | 0.34 (0.010)                 | Not assessed                              | Not assessed                                                     | 0.25, ND [9]                 |
| Pyrimethamine         | 0.085 (0.0060)               | 0.095 (0.0010)                            | Not assessed                                                     | 0.088, ED [20]               |
| Pyronaridine          | 0.21 (0.011)                 | 0.090 (0.010)                             | Not assessed                                                     | <0.35, ND [9]                |
| Quinine               | 0.20 (0.013)                 | Not assessed                              | Not assessed                                                     | 0.15, ED [21]                |
| SJ733                 | 0.17 (0.0050)                | 0.10 (0.024)                              | 0.085 (0.012)                                                    | Not available                |
| Sulfadoxine           | 0.036 (0.0010)               | 0.025 (0.0011)                            | Not assessed                                                     | 0.05-0.1, ND [9]             |
| Sulfamethoxazole      | 0.32 (0.024)                 | Not assessed                              | Not assessed                                                     | 0.27, ED [22]                |
| Tafenoquine           | 0.11 (0.015)                 | <0.0007                                   | 0.00070 (0.00017)                                                | <0.005, UF [16]              |
| TDD-E209              | 0.094 (0.011)                | <0.0001                                   | <0.0001                                                          | Not available                |

UF=ultrafiltration

ED=equilibrium dialysis

EP=erythrocyte partitioning method

ND=method not described

**Table S10** *In vitro* intrinsic clearance for control compounds. Data represent the mean (S.D.) for 11-21 independent measurements except for midazolam which was only 6 independent measurements over the course of the study. Literature values were obtained using a similar microsomal protein concentration (0.5 mg/mL) compared to our studies (0.4 mg/mL).

| Compound         | Range HLM CL <sub>int</sub> (μL/min/mg) | Mean CL <sub>int</sub> (μL/min/mg) | Literature CL <sub>int</sub> (μL/min/mg) |
|------------------|-----------------------------------------|------------------------------------|------------------------------------------|
| omeprazole       | 15.9 – 40.9                             | 24.2 (8.5)                         | 18 [23], 78.3 [24]                       |
| phenacetin       | 13.3 – 31.1                             | 21.4 (6.4)                         | 27 [23], 22.2 [24]                       |
| dextromethorphan | 20.4 – 55.4                             | 37.3 (10.1)                        | 23 [25], 62 [26]                         |
| verapamil        | 69 – 185                                | 118 (30)                           | 142 [23], 140 [24], 139 [27], 153 [28]   |
| diclofenac       | 107 – 391                               | 183 (67)                           | 207[23], 210 [27], 294 [28]              |
| midazolam        | 240 – 300                               | 272 (22)                           | 353 [23], 178 [27], 287 [28]             |

**Table S11 Measured IC<sub>50</sub> and K<sub>i</sub> values for positive control inhibitors. Data for K<sub>i</sub> represent mean (S.D.) for 6-9 independent measurements over the course of the study.**

| CYP isoform | Metabolic pathway                | Positive control inhibitor | IC <sub>50</sub> (μM) | K <sub>i</sub> (μM) | Literature K <sub>i</sub> (μM) (range)                   |
|-------------|----------------------------------|----------------------------|-----------------------|---------------------|----------------------------------------------------------|
| CYP1A2      | phenacetin O-deethylation        | furafylline <sup>c</sup>   | 4.47 (0.60)           | 2.64 (0.35)         | 0.88 [1] <sup>a</sup> , (0.6-4.4) [29] <sup>b</sup>      |
| CYP2C9      | tolbutamide methylhydroxylation  | sulfaphenazole             | 0.633 (0.15)          | 0.459 (0.13)        | 0.135 [1] <sup>a</sup> , (0.12-0.7) [29] <sup>b</sup>    |
| CYP2C19     | (S)-mephenytoin 4'-hydroxylation | ticlopidine <sup>c</sup>   | 2.35 (0.82)           | 1.40 (0.49)         | 1.2 [30], (0.02-3.7) [29] <sup>b</sup>                   |
| CYP2D6      | dextromethorphan O-demethylation | quinidine                  | 0.0220 (0.0059)       | 0.0162 (0.0079)     | 0.029 [1] <sup>a</sup> , (0.03-0.4) [29] <sup>b</sup>    |
| CYP3A4      | midazolam 1'-hydroxylation       | ketoconazole               | 0.0162 (0.0039)       | 0.00973 (0.0023)    | 0.0095 [1] <sup>a</sup> , (0.004-0.18) [31] <sup>b</sup> |
| CYP3A4      | testosterone 6β-hydroxylation    | ketoconazole               | 0.0154 (0.0067)       | 0.0110 (0.0048)     | 0.0130 [1] <sup>a</sup> , (0.045-0.3) [31] <sup>b</sup>  |

<sup>a</sup> calculated from IC<sub>50</sub> / 2 assuming competitive inhibition; substrate concentration used by authors was equal to the K<sub>m</sub>

<sup>b</sup> and references therein

<sup>c</sup> mechanism-based inhibitor [32]

**Table S12 Comparison of measured Caco-2  $P_{app}$  value with data from the literature.**

| Compound           | A-B $P_{app}$<br>( $10^{-6}$ cm/sec) | ER   | Literature $P_{app}$ ( $10^{-6}$ cm/sec), ER     |
|--------------------|--------------------------------------|------|--------------------------------------------------|
| Amodiaquine        | $90 \pm 8.3^a$                       | 0.7  | $16.0 \pm 1.1$ , 1.3 [33]                        |
| Artemisone         | 58.8, 64.5                           | 0.8  | $59.6 \pm 4.2$ , 0.8 [33]                        |
| Artesunate         | 3.4, 2.9                             | 0.9  | $10.2 \pm 0.3$ , 1.2 [33],<br>$4.0 \pm 0.4$ [34] |
| Dihydroartemisinin | $50 \pm 2.3$                         | 1.0  | $38.6 \pm 5.0$ [35]                              |
| Mefloquine         | $180 \pm 20^a$                       | 0.83 | $9.9 \pm 0.7$ , 0.7 [33]                         |
| Naphthoquine       | $230 \pm 32^a$                       | 0.8  | $27.3 \pm 0.6$ , 0.8 [35]                        |
| Pyronaridine       | $16 \pm 2.2^a$                       | 2.6  | $10.3 \pm 0.3$ , 1.8 [35]                        |
| Piperaquine        | $>300^a$                             | ---  | 0 [35]                                           |

<sup>a</sup> Caco-2 experiment conducted in the presence of human plasma to improve mass balance and sink conditions. The  $f_u$  value was taken into account when calculating the apparent  $P_{app}$  values.

## REFERENCES

1. Walsky RL, Obach RS. Validated assays for human cytochrome P450 activities. *Drug Metab Dispos* 2004; 32:647-660.
2. Nakai D, Kumamoto K, Sakikawa C, Kosaka T, Tokui T. Evaluation of the protein binding ratio of drugs by a micro-scale ultracentrifugation method. *J Pharm Sci* 2004; 93:847-854.
3. Curran RE, Claxton CR, Hutchison L, Harradine PJ, Martin IJ, Littlewood P. Control and measurement of plasma pH in equilibrium dialysis: influence on drug plasma protein binding. *Drug Metab Dispos* 2011; 39:551-557.
4. Williams RL, Upton RA, Buskin JN, Jones RM. Ketoprofen-aspirin interactions. *Clin Pharmacol Ther* 1981; 30:226-231.
5. Kochansky CJ, McMasters DR, Lu P, Koeplinger KA, Kerr HH, Shou M, Korzekwa KR. Impact of pH on plasma protein binding in equilibrium dialysis. *Mol Pharm* 2008; 5:438-448.
6. Krishna S, White NJ. Pharmacokinetics of quinine, chloroquine and amodiaquine. Clinical implications. *Clin Pharmacokinet* 1996; 30:263-299.
7. Ramanathan-Girish S, Catz P, Creek MR, Wu B, Thomas D, Krogstad DJ, De D, Mirsalis JC, Green CE. Pharmacokinetics of the antimalarial drug, AQ-13, in rats and cynomolgus macaques. *Int J Toxicol* 2004; 23:179-189.
8. Colussi D, Parisot C, Legay F, Lefevre G. Binding of artemether and lumefantrine to plasma proteins and erythrocytes. *Eur J Pharm Sci* 1999; 9:9-16.
9. Giao PT, de Vries PJ. Pharmacokinetic interactions of antimalarial agents. *Clin Pharmacokinet* 2001; 40:343-373.
10. Foulds G, Shepard RM, Johnson RB. The pharmacokinetics of azithromycin in human serum and tissues. *J Antimicrob Chemother* 1990; 25 Suppl A:73-82.
11. Walker O, Birkett DJ, Alvan G, Gustafsson LL, Sjoqvist F. Characterization of chloroquine plasma protein binding in man. *Br J Clin Pharmacol* 1983; 15:375-377.
12. Gordon RC, Regamey C, Kirby WM. Serum protein binding of erythromycin, lincomycin, and clindamycin. *J Pharm Sci* 1973; 62:1074-1077.
13. Ahmad RA, Rogers HJ. Plasma and salivary pharmacokinetics of dapsone estimated by a thin layer chromatographic method. *Eur J Clin Pharmacol* 1980; 17:129-133.
14. Batty KT, Ilett KF, Davis TM. Protein binding and alpha : beta anomer ratio of dihydroartemisinin in vivo. *Br J Clin Pharmacol* 2004; 57:529-533.

15. Houin G, Brunner F, Nebout T, Cherfaoui M, Lagrue G, Tillement JP. The effects of chronic renal insufficiency on the pharmacokinetics of doxycycline in man. *Br J Clin Pharmacol* 1983; 16:245-252.
16. Birrell GW, Heffernan GD, Schiehser GA, Anderson J, Ager AL, Morales P, MacKenzie D, van Breda K, Chavchich M, Jacobus LR, et al. Characterization of the preclinical pharmacology of the new 2-aminomethylphenol, JPC-3210, for malaria treatment and prevention. *Antimicrob Agents Chemother* 2018; 62:e01335-01317.
17. Baragana B, Hallyburton I, Lee MC, Norcross NR, Grimaldi R, Otto TD, Proto WR, Blagborough AM, Meister S, Wirjanata G, et al. A novel multiple-stage antimalarial agent that inhibits protein synthesis. *Nature* 2015; 522:315-320.
18. White NJ. Clinical pharmacokinetics of antimalarial drugs. *Clin Pharmacokinet* 1985; 10:187-215.
19. Hoglund RM, Adam I, Hanpithakpong W, Ashton M, Lindegardh N, Day NP, White NJ, Nosten F, Tarning J. A population pharmacokinetic model of piperazine in pregnant and non-pregnant women with uncomplicated *Plasmodium falciparum* malaria in Sudan. *Malar J* 2012; 11:398.
20. Rudy AC, Poynor WJ. Binding of pyrimethamine to human plasma proteins and erythrocytes. *Pharm Res* 1990; 7:1055-1060.
21. Wanwimolruk S, Denton JR. Plasma protein binding of quinine: binding to human serum albumin, alpha 1-acid glycoprotein and plasma from patients with malaria. *J Pharm Pharmacol* 1992; 44:806-811.
22. Wijkstrom A, Westerlund D. Plasma protein binding of sulphadiazine, sulphamethoxazole and trimethoprim determined by ultrafiltration. *J Pharm Biomed Anal* 1983; 1:293-299.
23. Sohlenius-Sternbeck AK, Afzelius L, Prusis P, Neelissen J, Hoogstraate J, Johansson J, Floby E, Bengtsson A, Gissberg O, Sternbeck J, Petersson C. Evaluation of the human prediction of clearance from hepatocyte and microsome intrinsic clearance for 52 drug compounds. *Xenobiotica* 2010; 40:637-649.
24. Ito K, Houston JB. Prediction of human drug clearance from in vitro and preclinical data using physiologically based and empirical approaches. *Pharm Res* 2005; 22:103-112.
25. Youdim K, Dodia R. Comparison between recombinant P450s and human liver microsomes in the determination of cytochrome P450 Michaelis-Menten constants. *Xenobiotica* 2010; 40:235-244.
26. Chen Y, Liu L, Nguyen K, Fretland AJ. Utility of intersystem extrapolation factors in early reaction phenotyping and the quantitative extrapolation of human liver microsomal intrinsic clearance using recombinant cytochromes P450. *Drug Metab Dispos* 2011; 39:373-382.

27. Obach RS. Prediction of human clearance of twenty-nine drugs from hepatic microsomal intrinsic clearance data: An examination of in vitro half-life approach and nonspecific binding to microsomes. *Drug Metab Dispos* 1999; 27:1350-1359.
28. Giuliano C, Jairaj M, Zafiu CM, Laufer R. Direct determination of unbound intrinsic drug clearance in the microsomal stability assay. *Drug Metab Dispos* 2005; 33:1319-1324.
29. Khojasteh SC, Prabhu S, Kenny JR, Halladay JS, Lu AY. Chemical inhibitors of cytochrome P450 isoforms in human liver microsomes: a re-evaluation of P450 isoform selectivity. *Eur J Drug Metab Pharmacokinet* 2011; 36:1-16.
30. Ko JW, Desta Z, Soukhova NV, Tracy T, Flockhart DA. In vitro inhibition of the cytochrome P450 (CYP450) system by the antiplatelet drug ticlopidine: potent effect on CYP2C19 and CYP2D6. *Br J Clin Pharmacol* 2000; 49:343-351.
31. Greenblatt DJ, Venkatakrisnan K, Harmatz JS, Parent SJ, von Moltke LL. Sources of variability in ketoconazole inhibition of human cytochrome P450 3A in vitro. *Xenobiotica* 2010; 40:713-720.
32. Obach RS, Walsky RL, Venkatakrisnan K. Mechanism-based inactivation of human cytochrome p450 enzymes and the prediction of drug-drug interactions. *Drug Metab Dispos* 2007; 35:246-255.
33. Senarathna SM, Page-Sharp M, Crowe A. The interactions of P-Glycoprotein with antimalarial drugs, including substrate affinity, inhibition and regulation. *PLoS One* 2016; 11:e0152677.
34. Augustijns P, D'Hulst A, Van Daele J, Kinget R. Transport of artemisinin and sodium artesunate in Caco-2 intestinal epithelial cells. *J Pharm Sci* 1996; 85:577-579.
35. Crowe A, Ilett KF, Karunajeewa HA, Batty KT, Davis TM. Role of P glycoprotein in absorption of novel antimalarial drugs. *Antimicrob Agents Chemother* 2006; 50:3504-3506.
